# Supplementary material for: Novel lanthanide–azido complexes: hydrothermal syntheses, structures and magnetic properties
Source: Royal Society of Chemistry journal article supplement (doi:10.1039/b819955h), 2009-01-01
Supplement: b819955h.pdf [file b819955h.pdf]

## Novel lanthanide-azido complexes: hydrothermal syntheses, structures and magnetic properties

Fu-Chen Liu, Yong-Fei Zeng, Jiong-Peng Zhao, Bo-Wen Hu, Xin Hu, Joan Ribas, Xian-He Bu\*

### Electronic Supplementary Information

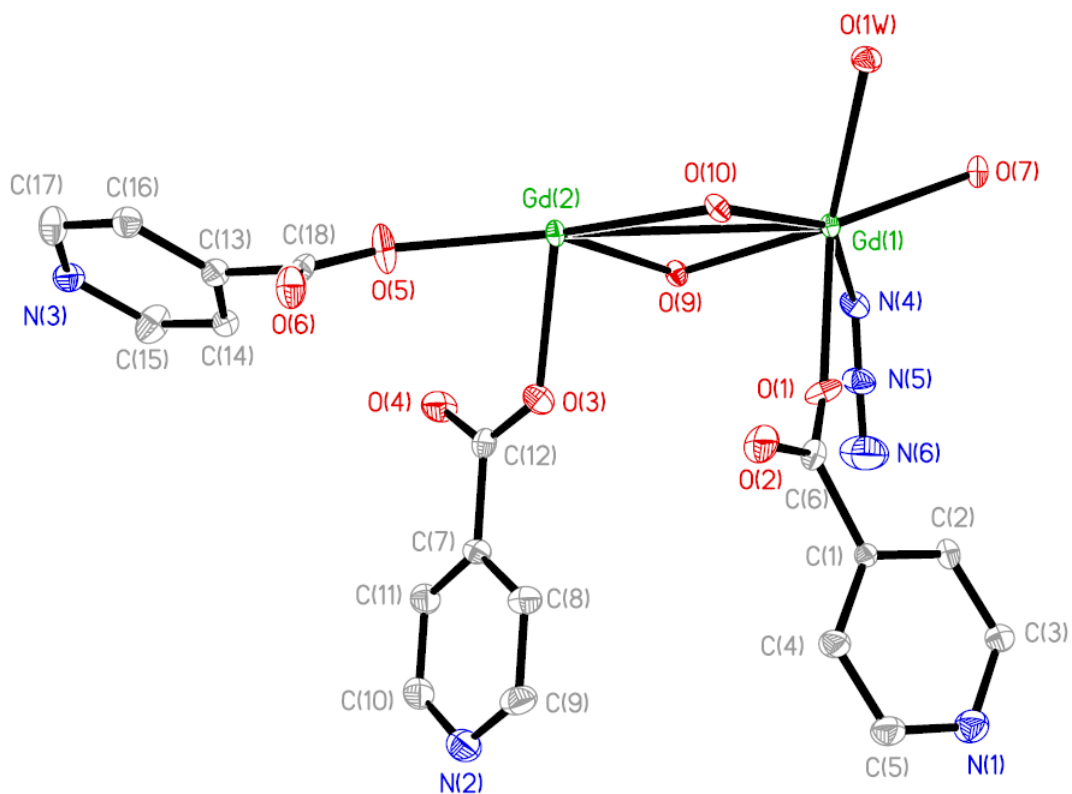

Fig. S1 The asymmetric unit of **1**

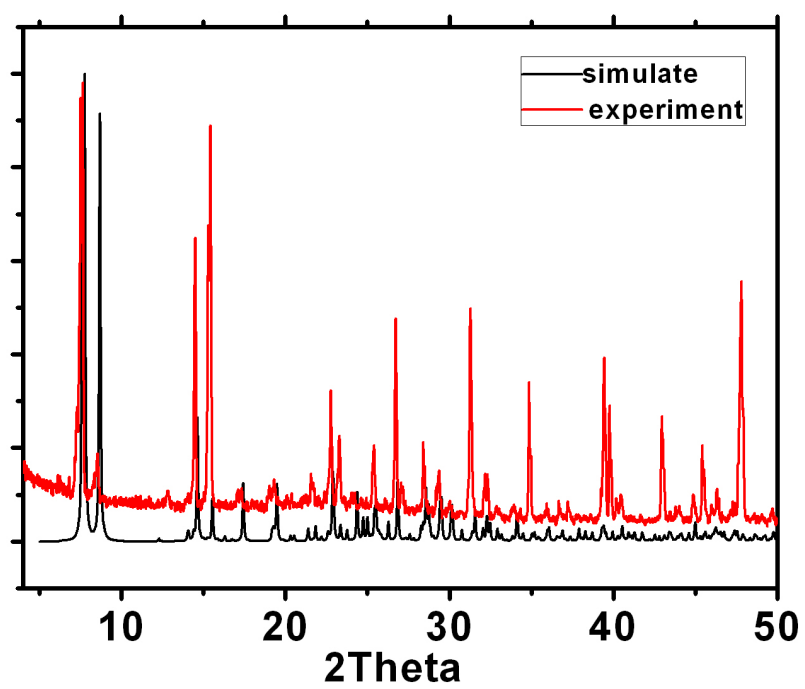

Fig. S2 The XRPD diagrams for complex 1.

TabS1 The selected bonds length (Å) and angles (°) of **2**

|                     |            |                      |            |
|---------------------|------------|----------------------|------------|
| Eu(1)-O(1)          | 2.362(6)   | Eu(1)-O(10)          | 2.414(4)   |
| Eu(1)-O(9)#1        | 2.380(5)   | Eu(1)-O(1W)          | 2.446(5)   |
| Eu(1)-O(9)          | 2.399(4)   | Eu(1)-N(4)           | 2.544(6)   |
| Eu(1)-O(6)#2        | 2.404(5)   | Eu(1)-O(7)           | 2.607(5)   |
| Eu(2)-O(5)          | 2.364(5)   | Eu(2)-O(9)           | 2.416(5)   |
| Eu(2)-O(2)#2        | 2.365(6)   | Eu(2)-O(10)#2        | 2.44(4)    |
| Eu(2)-O(3)          | 2.372(6)   | Eu(2)-N(4)#1         | 2.492(6)   |
| Eu(2)-O(10)         | 2.398(4)   | Eu(2)-O(7)#1         | 2.573(5)   |
| O(1)-Eu(1)-O(9)#1   | 136.64(17) | O(5)-Eu(2)-O(2)#2    | 76.9(2)    |
| O(1)-Eu(1)-O(9)     | 75.66(18)  | O(5)-Eu(2)-O(3)      | 80.3(2)    |
| O(9)#1-Eu(1)-O(9)   | 72.37(17)  | O(2)#2-Eu(2)-O(3)    | 147.79(18) |
| O(1)-Eu(1)-O(6)#2   | 75.27(19)  | O(5)-Eu(2)-O(10)     | 149.93(17) |
| O(9)#1-Eu(1)-O(6)#2 | 141.24(17) | O(2)#2-Eu(2)-O(10)   | 82.51(18)  |
| O(9)-Eu(1)-O(6)#2   | 146.37(17) | O(3)-Eu(2)-O(10)     | 107.8(18)  |
| O(1)-Eu(1)-O(10)    | 83.01(18)  | O(5)-Eu(2)-O(9)      | 137.94(18) |
| O(9)#1-Eu(1)-O(10)  | 112.44(16) | O(2)#2-Eu(2)-O(9)    | 138.06(17) |
| O(9)-Eu(1)-O(10)    | 70.91(15)  | O(3)-Eu(2)-O(9)      | 73.1(17)   |
| O(6)#2-Eu(1)-O(10)  | 89.07(16)  | O(10)-Eu(2)-O(9)     | 70.9(15)   |
| O(1)-Eu(1)-O(1W)    | 144.58(18) | O(5)-Eu(2)-O(10)#2   | 81.35(17)  |
| O(9)#1-Eu(1)-O(1W)  | 78.32(17)  | O(2)#2-Eu(2)-O(10)#2 | 82.71(18)  |
| O(9)-Eu(1)-O(1W)    | 121.63(18) | O(3)-Eu(2)-O(10)#2   | 71.49(17)  |
| O(6)#2-Eu(1)-O(1W)  | 76.37(19)  | O(10)-Eu(2)-O(10)#2  | 74.41(16)  |
| O(10)-Eu(1)-O(1W)   | 75.72(16)  | O(9)-Eu(2)-O(10)#2   | 118.54(16) |
| O(1)-Eu(1)-N(4)     | 75.88(19)  | O(5)-Eu(2)-N(4)#1    | 112.4(2)   |
| O(9)#1-Eu(1)-N(4)   | 68.8(2)    | O(2)#2-Eu(2)-N(4)#1  | 76.1(2)    |
| O(9)-Eu(1)-N(4)     | 76.49(18)  | O(3)-Eu(2)-N(4)#1    | 134.36(19) |
| O(6)#2-Eu(1)-N(4)   | 112.0(2)   | O(10)-Eu(2)-N(4)#1   | 83.08(18)  |
| O(10)-Eu(1)-N(4)    | 144.62(18) | O(9)-Eu(2)-N(4)#1    | 69.11(19)  |
| O(1W)-Eu(1)-N(4)    | 135.28(18) | O(10)#2-Eu(2)-N(4)#1 | 150.88(18) |
| O(1)-Eu(1)-O(7)     | 116.65(18) | O(5)-Eu(2)-O(7)#1    | 73.47(17)  |
| O(9)#1-Eu(1)-O(7)   | 69.39(15)  | O(2)#2-Eu(2)-O(7)#1  | 116.46(19) |
| O(9)-Eu(1)-O(7)     | 132.81(15) | O(3)-Eu(2)-O(7)#1    | 77.66(17)  |
| O(6)#2-Eu(1)-O(7)   | 76.31(16)  | O(10)-Eu(2)-O(7)#1   | 136.13(15) |
| O(10)-Eu(1)-O(7)    | 150.56(16) | O(9)-Eu(2)-O(7)#1    | 69.44(15)  |
| O(1W)-Eu(1)-O(7)    | 76.05(16)  | O(10)#2-Eu(2)-O(7)#1 | 142.89(15) |
| N(4)-Eu(1)-O(7)     | 64.65(18)  | N(4)#1-Eu(2)-O(7)#1  | 65.87(18)  |

Symmetry transformations used to generate equivalent atoms:

#1 -x, -y+2, -z+1

#2 -x+1, -y+2, -z+1

TabS2 The selected bonds length (Å) and angles (°) of **3**

|                     |            |                      |            |
|---------------------|------------|----------------------|------------|
| Sm(1)-O(1)          | 2.376(6)   | Sm(1)-O(10)          | 2.434(5)   |
| Sm(1)-O(9)#1        | 2.361(5)   | Sm(1)-O(1W)          | 2.451(6)   |
| Sm(1)-O(9)          | 2.413(6)   | Sm(1)-N(4)           | 2.565(7)   |
| Sm(1)-O(6)#2        | 2.408(6)   | Sm(1)-O(7)           | 2.614(6)   |
| Sm(2)-O(2)#2        | 2.394(6)   | Sm(2)-O(9)           | 2.446(5)   |
| Sm(2)-O(5)          | 2.377(7)   | Sm(2)-O(10)#2        | 2.449(5)   |
| Sm(2)-O(3)          | 2.387(6)   | Sm(2)-N(4)#1         | 2.502(7)   |
| Sm(2)-O(10)         | 2.408(6)   | Sm(2)-O(7)#1         | 2.59(6)    |
| O(1)-Sm(1)-O(9)#1   | 136.4(2)   | O(2)#2-Sm(2)-O(5)    | 77.0(3)    |
| O(1)-Sm(1)-O(9)     | 75.9(2)    | O(2)#2-Sm(2)-O(3)    | 147.8(2)   |
| O(9)#1-Sm(1)-O(9)   | 71.5(2)    | O(5)-Sm(2)-O(3)      | 79.9(2)    |
| O(1)-Sm(1)-O(6)#2   | 75.8(2)    | O(2)#2-Sm(2)-O(10)   | 82.3(2)    |
| O(9)#1-Sm(1)-O(6)#2 | 141.2(2)   | O(5)-Sm(2)-O(10)     | 149.8(2)   |
| O(9)-Sm(1)-O(6)#2   | 147.3(2)   | O(3)-Sm(2)-O(10)     | 108.4(2)   |
| O(1)-Sm(1)-O(10)    | 83.19(19)  | O(2)#2-Sm(2)-O(9)    | 137.8(2)   |
| O(9)#1-Sm(1)-O(10)  | 112.11(19) | O(5)-Sm(2)-O(9)      | 137.7(2)   |
| O(9)-Sm(1)-O(10)    | 71.53(19)  | O(3)-Sm(2)-O(9)      | 73.5(2)    |
| O(6)#2-Sm(1)-O(10)  | 89.2(2)    | O(10)-Sm(2)-O(9)     | 71.42(19)  |
| O(1)-Sm(1)-O(1W)    | 144.8(2)   | O(2)#2-Sm(2)-O(10)#2 | 83.1(2)    |
| O(9)#1-Sm(1)-O(1W)  | 78.33(19)  | O(5)-Sm(2)-O(10)#2   | 81.3(2)    |
| O(9)-Sm(1)-O(1W)    | 121.5(2)   | O(3)-Sm(2)-O(10)#2   | 71.37(19)  |
| O(6)#2-Sm(1)-O(1W)  | 76.2(2)    | O(10)-Sm(2)-O(10)#2  | 74.4(2)    |
| O(10)-Sm(1)-O(1W)   | 75.54(19)  | O(9)-Sm(2)-O(10)#2   | 118.88(19) |
| O(1)-Sm(1)-N(4)     | 75.8(2)    | O(2)#2-Sm(2)-N(4)#1  | 76.0(2)    |
| O(9)#1-Sm(1)-N(4)   | 68.9(2)    | O(5)-Sm(2)-N(4)#1    | 112.5(3)   |
| O(9)-Sm(1)-N(4)     | 76.1(2)    | O(3)-Sm(2)-N(4)#1    | 134.4(2)   |
| O(6)#2-Sm(1)-N(4)   | 111.9(2)   | O(10)-Sm(2)-N(4)#1   | 83.0(2)    |
| O(10)-Sm(1)-N(4)    | 144.8(2)   | O(9)-Sm(2)-N(4)#1    | 68.7(2)    |
| O(1W)-Sm(1)-N(4)    | 135.2(2)   | O(10)#2-Sm(2)-N(4)#1 | 151.0(2)   |
| O(1)-Sm(1)-O(7)     | 116.9(2)   | O(2)#2-Sm(2)-O(7)#1  | 116.6(2)   |
| O(9)#1-Sm(1)-O(7)   | 69.57(19)  | O(5)-Sm(2)-O(7)#1    | 73.7(2)    |
| O(9)-Sm(1)-O(7)     | 132.17(18) | O(3)-Sm(2)-O(7)#1    | 77.2(2)    |
| O(6)#2-Sm(1)-O(7)   | 76.1(2)    | O(10)-Sm(2)-O(7)#1   | 136.09(18) |
| O(10)-Sm(1)-O(7)    | 150.27(18) | O(9)-Sm(2)-O(7)#1    | 68.76(18)  |
| O(1W)-Sm(1)-O(7)    | 75.91(19)  | O(10)#2-Sm(2)-O(7)#1 | 142.71(18) |
| N(4)-Sm(1)-O(7)     | 64.7(2)    | N(4)#1-Sm(2)-O(7)#1  | 65.9(2)    |

Symmetry transformations used to generate equivalent atoms:

#1 -x,-y+2,-z+1      #2 -x+1,-y+2,-z+1
